# Supplementary material for: Surveillance of the major pathogenic arboviruses of public health concern in Gabon, Central Africa: increased risk of West Nile virus and dengue virus infections
Source: BMC Infect Dis. 2021 Mar 17;21:265. doi: 10.1186/s12879-021-05960-9 (PMC7966894; doi:10.1186/s12879-021-05960-9)
Supplement: Supplementary file 4 — Additional file 4: Table S4. Clinical pictures of patients infected with WNV [file 12879_2021_5960_MOESM4_ESM.xlsx]

## Sheet: Table S4
Table S4 Clinical pictures of patients infected with WNV
Sample ID	Age (years)	Sex	Residence	Onset of fever (days)	Body temperature	Rash	Fatigue	Headache	Nasal obstruction	Sore throat	Nausea / vomiting	Diarrhea	Constipation	Cough	Dyspnea	Nosebleed	Gingival bleeding	Petechiae	Hematemesis	hematuria	Arthralgia	Myalgia	RDT for Malaria
01	2	M	Lambaréné	3	37.9	No	Yes	Yes	Yes	No	No	Yes	No	Yes	Yes	No	No	No	No	No	No	No	Negative
02	4	M	Lambaréné	4	38.5	Yes	No	Yes	Yes	No	No	No	No	Yes	No	No	No	No	No	No	No	No	Negative
03	1	M	Lambaréné	3	38.9	No	No	No	Yes	No	No	Yes	No	Yes	Yes	No	No	Yes	No	Yes	No	No	Negative
